# Supplementary material for: Genetic Testing as a New Standard for Clinical Diagnosis of Color Vision Deficiencies
Source: PubMed Central journal article supplement — Transl Vis Sci Technol. 2016 Sep 6;5(5):2. doi: 10.1167/tvst.5.5.2 (PMC5017313; doi:10.1167/tvst.5.5.2), 2016-09-06
Supplement: i2164-2591-5-5-2-s02.pdf [file i2164-2591-5-5-2-s02.pdf]

**Figure S1**

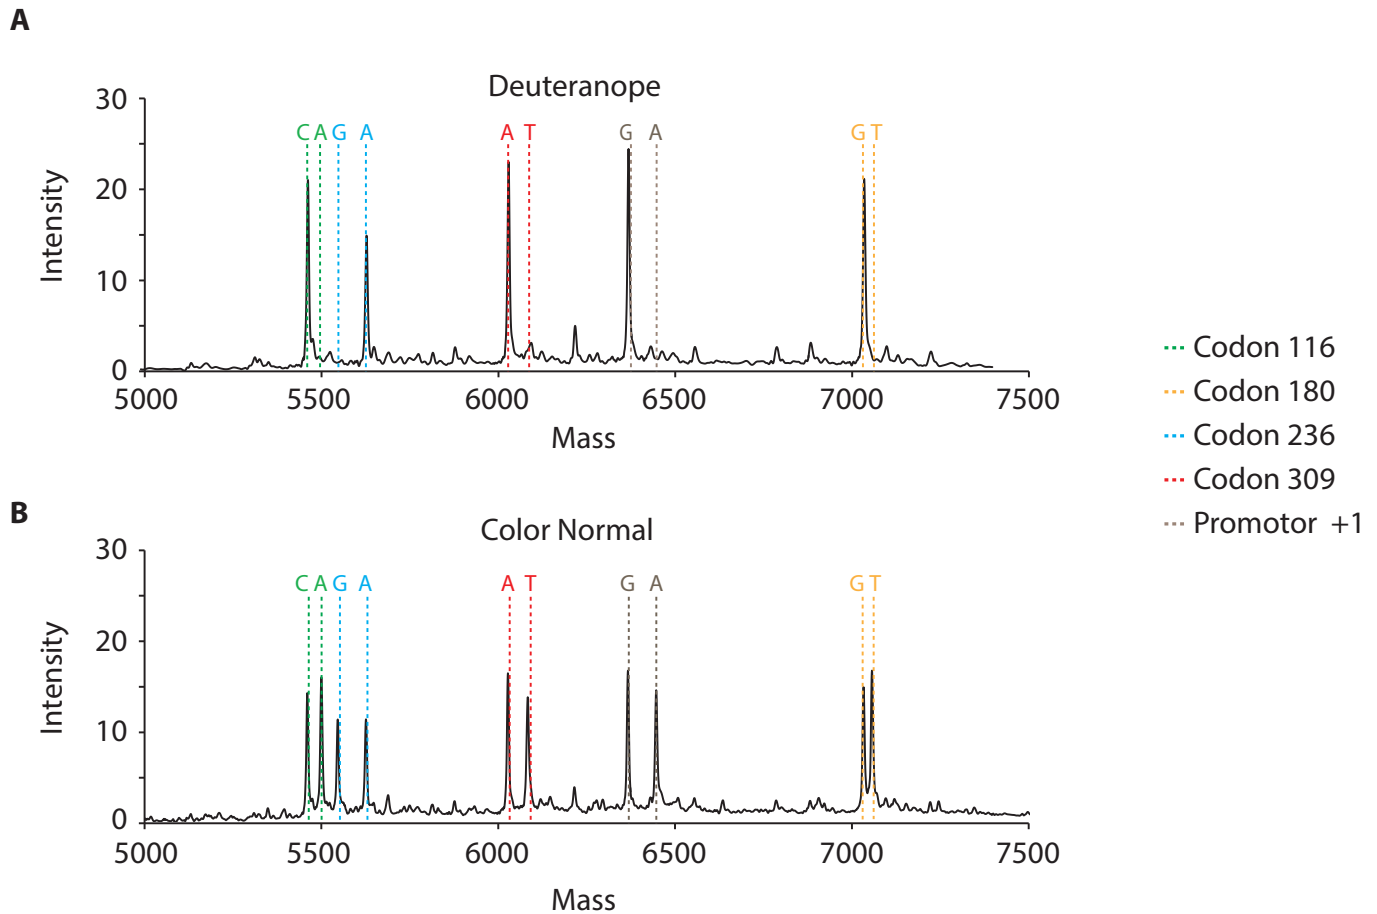

**Figure S1.** Sample raw data from the MassArray. Five different SNPs were assayed in this particular run. The top panel is for a single gene dichromat; he has only one of the two possible alleles at each position. The bottom panel shows results for a normal person with one L and one M gene. The proportion of the areas under the two peaks for the two possible “promoter” alleles provide an estimate of the percent downstream genes as plotted on the X-axis in Figure 2 of the main manuscript. The proportion of the areas under the two peaks for the two possible “309” alleles provide an estimate of the percent L genes as plotted on the Y-axis of Figure 2 of the main manuscript. This normal person is classified as having two genes total, 1L and 1 M.
